# Supplementary material for: A Pervasive Pulmonary Function Estimation System with Six-Minute Walking Test
Source: MDPI journal article supplement (doi:10.3390/bios12100824), 2022-10-04
Supplement: s1 [file s1]

**Supplementary Table S1.** The predicted errors for the validation set.

| Item                                             | Estimated model                                    | Difference  |
|--------------------------------------------------|----------------------------------------------------|-------------|
| PSD (cm)                                         | PSD_estd                                           | -0.7 ± 9.7  |
|                                                  | PSD_H100                                           | 2.7 ± 11.6  |
| FEV <sub>1</sub> pre (L)                         | FEV <sub>1</sub> pre_estd                          | 0.1 ± 0.6   |
| FEV <sub>1</sub> post (L)                        | FEV <sub>1</sub> post_estd                         | 0.1 ± 0.6   |
| FVCpre (L)                                       | FVCpre_estd                                        | 0.2 ± 0.6   |
|                                                  | FVCpre_estd with PSD_estd                          | 0.2 ± 0.7   |
| FVCpost (L)                                      | FVCpost_estd                                       | 0.2 ± 0.7   |
|                                                  | FVCpost_estd with PSD_estd                         | 0.2 ± 0.7   |
| FEV <sub>1</sub> pre/FVCpre (%)                  | FEV <sub>1</sub> pre_estd/ FVCpre_estd             | -1.0 ± 17.4 |
| FEV <sub>1</sub> post/FVCpost (%)                | FEV <sub>1</sub> post_estd/ FVC post_estd          | -1.0 ± 17.9 |
| FEV <sub>1</sub> pre/ FEV <sub>1</sub> pred (%)  | FEV <sub>1</sub> pre_estd /FEV <sub>1</sub> pred   | 5.4 ± 24.4  |
| FEV <sub>1</sub> post/ FEV <sub>1</sub> pred (%) | FEV <sub>1</sub> post_estd / FEV <sub>1</sub> pred | 5.7 ± 24.3  |
